RETRACTION

# Retraction: Involvement of FOXO Transcription Factors, TRAIL-FasL/Fas, and Sirtuin Proteins Family in Canine Coronavirus Type II-Induced Apoptosis

The *PLOS One* Editors

After this article [1] was published, concerns were raised regarding results presented in Figures 1, 2, 3, 7, 8, 9, 10, and 11.

Specifically:

- There appears to be vertical and horizontal discontinuities in the background surrounding lanes of the following panels:
  - Figure 2A SIRT3
  - Figure 7A  $\beta$ -actin
  - Figure 8A  $\beta$ -actin
- There appears to be similarities between lanes within the following panels:
  - Figure 1A: SIRT1, FOXO3A, FOXO1, and  $\beta$ -actin
  - Figure 2A: SIRT4
  - Figure 3A: bax, bcl-2, and  $\beta$ -actin
  - Figure 7A: TIM50 (mitochondria)
  - Figure 9A: bax (mitochondria), bax (cytosol), and bcl-2 (cytosol)
  - Figure 10A: SIRT1, SIRT3, and  $\beta$ -actin
  - Figure 11A: FOXO3A and FOXO1
- The following results appear more similar than would be expected from independent results:
  - Figure 1A SIRT1 lanes 1, 2, and 7 of [1] and Figure 4B bax lanes 1, 2, and 7 of [2] respectively
  - Figure 1A FOXO3A lanes 2-6 of [1] and Figure 4B p27 lanes 2-6 of [2] respectively
  - Figure 1A FOXO1 lanes 1-4 of [1] and Figure 4B CDK-2 lanes 2-5 of [2] respectively

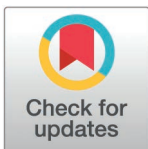

## OPEN ACCESS

**Citation:** The *PLOS One* Editors (2025) Retraction: Involvement of FOXO Transcription Factors, TRAIL-FasL/Fas, and Sirtuin Proteins Family in Canine Coronavirus Type II-Induced Apoptosis. *PLoS One* 20(5): e0324091. <https://doi.org/10.1371/journal.pone.0324091>

**Published:** May 6, 2025

**Copyright:** © 2025 The *PLOS One* Editors. This is an open access article distributed under the terms of the [Creative Commons Attribution License](https://creativecommons.org/licenses/by/4.0/), which permits unrestricted use, distribution, and reproduction in any medium, provided the original author and source are credited.

- Figure 1A FOXO1 lane 6 of [1], Figure 1A FOXO1 lane 7 of [1], and Figure 4B CDK-2 lane 7 of [2]
- Figure 1A  $\beta$ -actin lanes 1-3 and 6-7 of [1] and Figure 4B  $\beta$ -actin lanes 1-3 and 5-6 of [2] respectively
- Figure 1A  $\beta$ -actin lane 4 of [1], Figure 1A  $\beta$ -actin lane 5 of [1], and Figure 4B  $\beta$ -actin lane 4 of [2]

The authors' responses did not resolve the concerns with this article.

In light of the above concerns that question the integrity and reliability of the reported results and conclusions, the *PLOS One* Editors retract this article.

All authors did not respond to the final editorial decision.

The Figure 1A results report material that appears similar to results previously reported in [2] published in 2006 by The American Society of Hematology, which is not offered under a CC BY license. Due to restrictions that apply to the original article's license, Figure 1A is excluded from the PLOS article's [1] CC BY 4.0 license.

## References

1. Marfè G, Tafani M, Fiorito F, Pagnini U, Iovane G, De Martino L. Involvement of FOXO transcription factors, TRAIL-FasL/Fas, and sirtuin proteins family in canine coronavirus type II-induced apoptosis. *PLoS One*. 2011;6(11):e27313. <https://doi.org/10.1371/journal.pone.0027313> PMID: [22087287](https://pubmed.ncbi.nlm.nih.gov/22087287/)
2. Liu H, Zang C, Fenner MH, Liu D, Possinger K, Koeffler HP, et al. Growth inhibition and apoptosis in human Philadelphia chromosome-positive lymphoblastic leukemia cell lines by treatment with the dual PPARalpha/gamma ligand TZD18. *Blood*. 2006;107(9):3683–92. <https://doi.org/10.1182/blood-2005-05-2103> PMID: [16403907](https://pubmed.ncbi.nlm.nih.gov/16403907/)
